# Supplementary material for: Wearing surgical face mask has no significant impact on auscultation assessment
Source: PeerJ. 2024 May 24;12:e17368. doi: 10.7717/peerj.17368 (PMC11129690; doi:10.7717/peerj.17368)
Supplement: Supplemental Information 1 — Findings from three pulmonologists coded 0,00; 1,00; 2,00; 0,10; 0,20. The complete physical finding, expiration length, and different sound phenomena, and whether the patient wore a mask or not. [file peerj-12-17368-s001.xlsx]

## Sheet: auscultation_sum
sum_1	sum_2	sum_3	sum3kat_1	sum3kat_2	sum3kat_3	ID	mask
1	1.1	1	1	1	1		0
1	1	1	1	1	1		1
0	0	0	0	0	0		0
0	0.2	0.2	0	0	0		1
1	1.1	1	1	1	1		0
1	1	1	1	1	1		1
1	1	1	1	1	1		0
1	1	1	1	1	1		1
0	0	0	0	0	0		0
0	0	0	0	0	0		1
0	0.1	0	0	0	0		0
0	0	0	0	0	0		1
0	0	0	0	0	0		0
0.2	0	0	0	0	0		1
1	1	1	1	1	1		0
1	1	1	1	1	1		1
0	#NULL!	0	0	#NULL!	0		0
0	0.1	0	0	0	0		0
0	#NULL!	0.2	0	#NULL!	0		1
0	0	0	0	0	0		1
0	0	#NULL!	0	0	#NULL!		0
0	0.1	#NULL!	0	0	#NULL!		1
0	#NULL!	0	0	#NULL!	0		0
0	#NULL!	0	0	#NULL!	0		1
0.2	1	1	0	1	1		0
0	1	1	0	1	1		1
0	0.1	2	0	0	2		0
0	0	2	0	0	2		1
0	0	0	0	0	0		0
0	0	0	0	0	0		1
0	0.1	0	0	0	0		0
0	0	0.1	0	0	0		1
1	0	2	1	0	2		0
0	0	2	0	0	2		1
0	0	0	0	0	0		0
0	0	0	0	0	0		1
1	0	1	1	0	1		0
1	0	1	1	0	1		1
2	0	1.1	2	0	1		0
2	0	1	2	0	1		1
0	0.1	1	0	0	1		0
0.2	0	1	0	0	1		1
0	0.1	0	0	0	0		0
0	0	0.2	0	0	0		1
1	0	0	1	0	0		0
1	0	0	1	0	0		1
0	0	0.1	0	0	0		0
0	0.2	0	0	0	0		1
0	0	0	0	0	0		0
0	0	0.1	0	0	0		1
#NULL!	#NULL!	0	#NULL!	#NULL!	0		0
#NULL!	#NULL!	0.2	#NULL!	#NULL!	0		1
0	0	0	0	0	0		0
0	0.1	0	0	0	0		1
1.2	2	1	1	2	1		0
1	2	1	1	2	1		1
0	1	0	0	1	0		0
0	1	0	0	1	0		1
0	0	0	0	0	0		0
0	0	0.2	0	0	0		1
1	0	1	1	0	1		0
1	0	1	1	0	1		1
0	1	0.1	0	1	0		0
0	1	0	0	1	0		1
1	0	0	1	0	0		0
1	0.1	0	1	0	0		1
1	0	1	1	0	1		0
1	0	1	1	0	1		1
0	0	0	0	0	0		0
0	0	0	0	0	0		1
0	0	0	0	0	0		0
0	0	0	0	0	0		1
1	1	1	1	1	1		0
1	1	1	1	1	1		1
0	0	1.2	0	0	1		0
0	0	1	0	0	1		0
0	0	1	0	0	1		1
0	0	0	0	0	0		1
0	0	0	0	0	0		0
0	0	0.2	0	0	0		1
0	0.1	0.1	0	0	0		0
0	0	0	0	0	0		1
1	1	1	1	1	1		0
2	1	1	2	1	1		1
0	0.2	0.2	0	0	0		0
0	0	0	0	0	0		1
2	1	1	2	1	1		0
2	1	1	2	1	1		1
0	2	0	0	2	0		0
0	0	0	0	0	0		1
0	0	0	0	0	0		0
1	1	0	1	1	0		1
1	1	1	1	1	1		0
0	0	0.2	0	0	0		1
#NULL!	1	#NULL!	#NULL!	1	#NULL!		0
#NULL!	1	#NULL!	#NULL!	1	#NULL!		1
1	1	#NULL!	1	1	#NULL!		0
1	1.1	#NULL!	1	1	#NULL!		1
0	0	1	0	0	1		0
0	0	1	0	0	1		1
0	0	0	0	0	0		0
0	0	0	0	0	0		1
0	2	0	0	2	0		0
0.2	2	0	0	2	0		1
0	#NULL!	0	0	#NULL!	0		0
0	#NULL!	0	0	#NULL!	0		1
0	0	0	0	0	0		0
0	0.1	0.2	0	0	0		1
0	0	0	0	0	0		0
0	0	0	0	0	0		1
1	0	0	1	0	0		0
1.1	0	0	1	0	0		1
0	0	0	0	0	0		0
0.2	0	0	0	0	0		1
