# Supplementary material for: Wearing surgical face mask has no significant impact on auscultation assessment
Source: PeerJ. 2024 May 24;12:e17368. doi: 10.7717/peerj.17368 (PMC11129690; doi:10.7717/peerj.17368)
Supplement: Supplemental Information 2 — Findings from three pulmonologists. 1 is prolonged expirium and whether patient wore a mask or not. [file peerj-12-17368-s002.xlsx]

## Sheet: auscultation_expiration
expiration_1	expiration_2	expiration_3	ID	mask
1	0	0		0
1	0	0		1
0	0	1		0
0	0	1		1
1	0	1		0
1	0	1		1
1	0	0		0
1	0	0		1
1	0	0		0
1	0	0		1
0	0	0		0
0	0	0		1
1	0	0		0
1	0	0		1
1	0	0		0
1	0	0		1
1	0	0		0
1	0	0		1
1	0	0		0
1	0	0		1
1	1	1		0
1	1	1		1
1	0	0		0
1	0	0		1
1	0	0		0
1	0	0		1
1	1	0		0
1	1	1		1
1	0	1		0
1	0	1		0
1	0	1		1
1	0	1		1
0	0	1		0
0	0	0		1
1	0	0		0
1	0	0		1
0	0	1		0
0	0	1		1
0	0	0		0
1	0	0		1
0	0	1		0
0	0	1		1
0	0	0		0
0	0	0		1
1	0	1		0
1	0	1		1
1	0	0		0
1	0	0		1
0	0	0		0
0	1	0		1
0	0	0		0
0	0	0		1
0	0	0		0
0	0	0		1
