# Supplementary material for: Wearing surgical face mask has no significant impact on auscultation assessment
Source: PeerJ. 2024 May 24;12:e17368. doi: 10.7717/peerj.17368 (PMC11129690; doi:10.7717/peerj.17368)
Supplement: Supplemental Information 3 — Findings from three pulmonologists regarding lung sound phenomena: wheezing, crackles and rales and whether patient wore a mask or not. [file peerj-12-17368-s003.xlsx]

## Sheet: auscultation_sound fenom
wheese 1	wheese 2	wheese 3	crackles 1	crackles 2	crackles 3	rhales 1	rhales 1	rhales 1	ID	mask
0	0	0	0	1	0	0	0	0		0
0	1	0	0	0	0	1	1	1		0
1	1	1	0	0	0	0	0	0		0
0	0	0	1	0	0	0	0	0		0
0	#NULL!	0	0	#NULL!	1	0	#NULL!	0		0
0	0	0	1	0	0	0	0	0		0
0	0	0	1	1	1	0	0	0		0
0	0	0	0	0	0	1	0	0		0
0	1	0	1	0	0	0	0	0		0
0	0	0	1	0	0	0	0	0		0
0	0	0	1	0	1	0	0	0		0
0	0	0	1	1	1	0	0	0		0
1	0	0	0	0	0	0	0	0		0
0	1	1	1	1	0	0	0	0		0
0	0	0	0	1	0	0	0	0		0
0	0	1	0	1	1	0	0	0		0
1	1	1	0	1	0	0	0	0		0
1	0	0	0	1	0	0	0	0		0
0	0	0	1	1	1	0	0	0		0
#NULL!	0	0	#NULL!	1	1	#NULL!	0	0		0
0	0	0	0	1	0	0	0	0		0
0	0	0	1	1	0	0	0	1		0
0	0	0	1	0	0	0	0	0		0
1	0	1	0	0	0	0	1	0		0
#NULL!	0	0	#NULL!	1	1	#NULL!	0	0		0
0	0	0	0	1	0	0	0	0		0
0	1	0	1	1	1	0	0	0		0
1	0	#NULL!	0	0	#NULL!	0	0	#NULL!		0
1	1	1	0	0	1	0	0	0		0
1	0	0	0	0	0	0	0	0		0
0	1	0	1	0	1	0	0	0		0
0	0	0	1	1	1	0	0	0		0
0	0	0	0	1	0	0	0	0		1
0	1	0	0	0	0	1	1	1		1
1	1	1	0	0	0	0	0	0		1
0	1	1	1	0	0	0	0	0		1
0	#NULL!	0	0	#NULL!	1	0	#NULL!	0		1
0	0	0	1	0	0	0	0	0		1
0	0	0	1	1	1	0	0	0		1
0	0	0	0	0	0	1	0	0		1
0	0	0	1	0	0	0	0	0		1
0	0	0	1	1	0	0	0	0		1
0	0	0	1	0	1	0	0	0		1
0	0	0	1	1	1	0	0	0		1
1	0	0	0	0	0	0	0	0		1
0	1	0	1	1	0	0	0	0		1
0	0	0	0	1	0	0	0	0		1
0	0	1	0	1	1	0	0	0		1
1	1	1	0	1	0	0	0	0		1
1	0	0	0	1	0	0	0	0		1
0	0	0	1	1	1	0	0	0		1
#NULL!	0	0	#NULL!	0	1	#NULL!	0	0		1
0	0	0	0	1	1	0	0	0		1
0	0	0	1	0	0	0	0	1		1
0	0	0	1	0	0	0	0	0		1
1	0	1	0	0	0	0	1	1		1
#NULL!	0	0	#NULL!	1	1	#NULL!	0	0		1
0	0	0	1	1	0	0	0	0		1
0	0	0	1	1	1	0	0	0		1
1	0	#NULL!	0	0	#NULL!	0	0	#NULL!		1
1	1	1	0	1	0	0	0	0		1
1	0	0	0	0	0	0	0	0		1
0	1	0	1	0	1	0	0	0		1
0	0	0	1	1	1	0	0	0		1
